# Supplementary material for: Enhancer RNAs Mediate Estrogen-Induced Decommissioning of Selective Enhancers by Recruiting ERα and Its Cofactor
Source: PubMed Central journal article supplement — Cell Rep. Author manuscript; Available in PMC 2021 Nov 3. (PMC8564762; doi:10.1016/j.celrep.2020.107803), 2020-06-23
Supplement: NIHMS1747843-supplement-supplementary_material.pdf [file NIHMS1747843-supplement-supplementary_material.pdf]

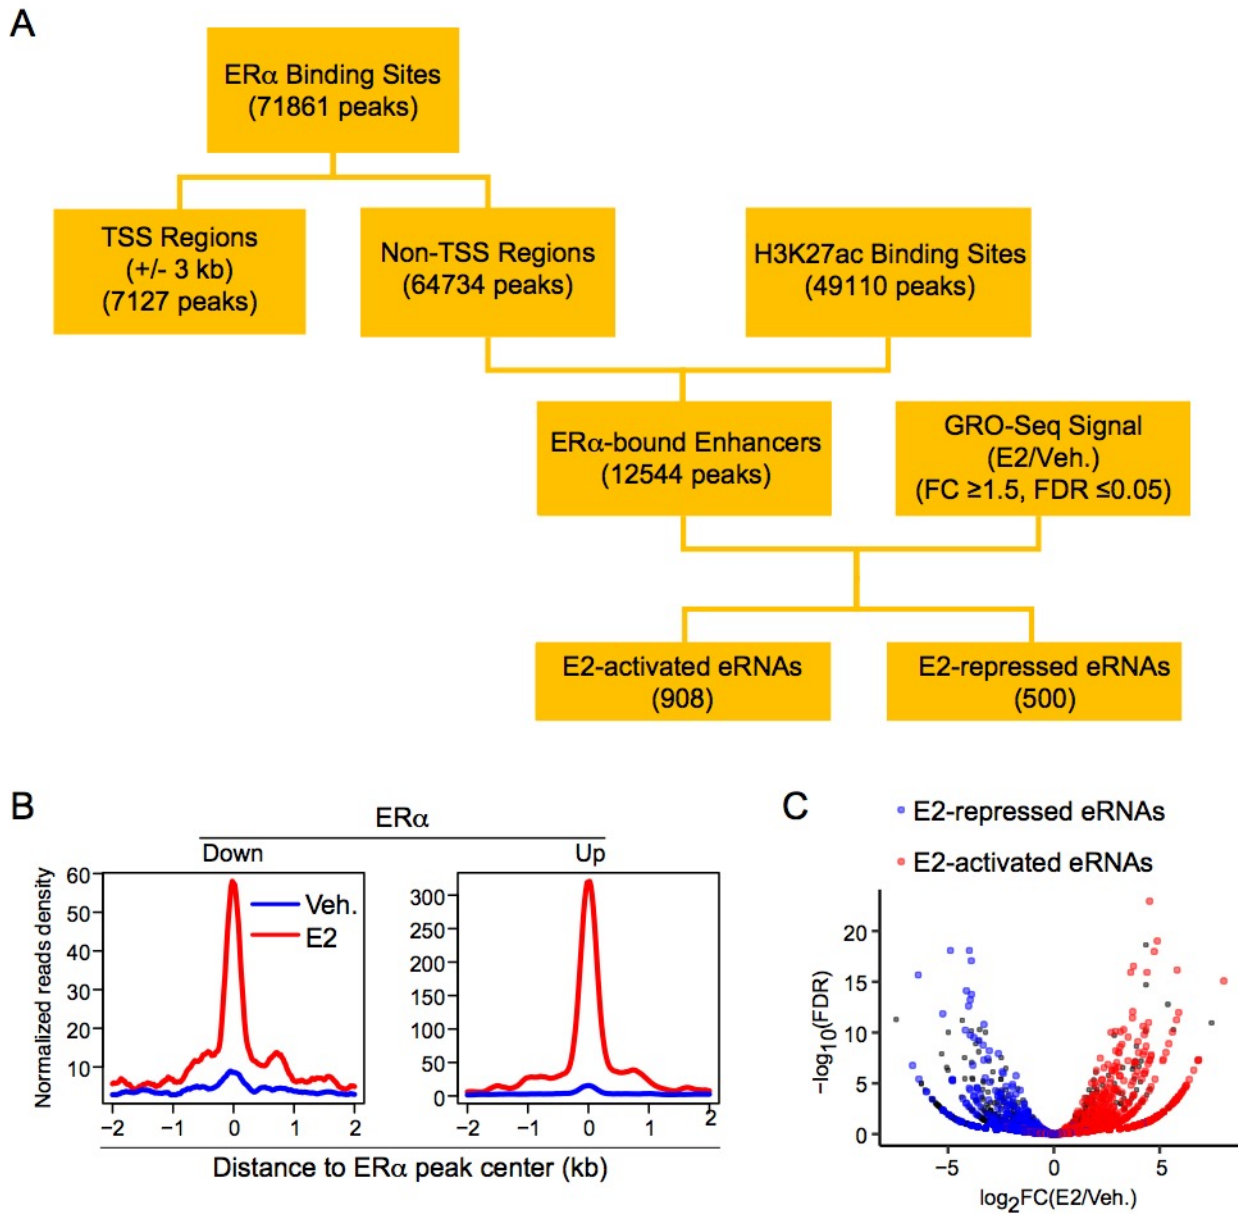

Figure S1. Two groups of ER $\alpha$ -bound enhancers that respond differentially to E2 were confirmed in separate data sets. Related to Figure 1.

- (A). Workflow of identifying ER $\alpha$ -bound enhancers that produce eRNAs differentially expressed upon E2 treatment.  
 (B). ER $\alpha$  binding intensities at E2-downregulated (Down) and E2-upregulated (Up) enhancer regions in the presence of vehicle (Veh.) or E2 using an independent ChIP-Seq data (GSE24166) (Tsai et al., 2010).  
 (C). Scatter plot showing the log<sub>2</sub>[fold change] (log<sub>2</sub>FC) of expression of the defined eRNAs under E2 and vehicle treatment conditions (E2/Veh.) in an independent GRO-Seq data (GSE59532) (Franco et al., 2015).

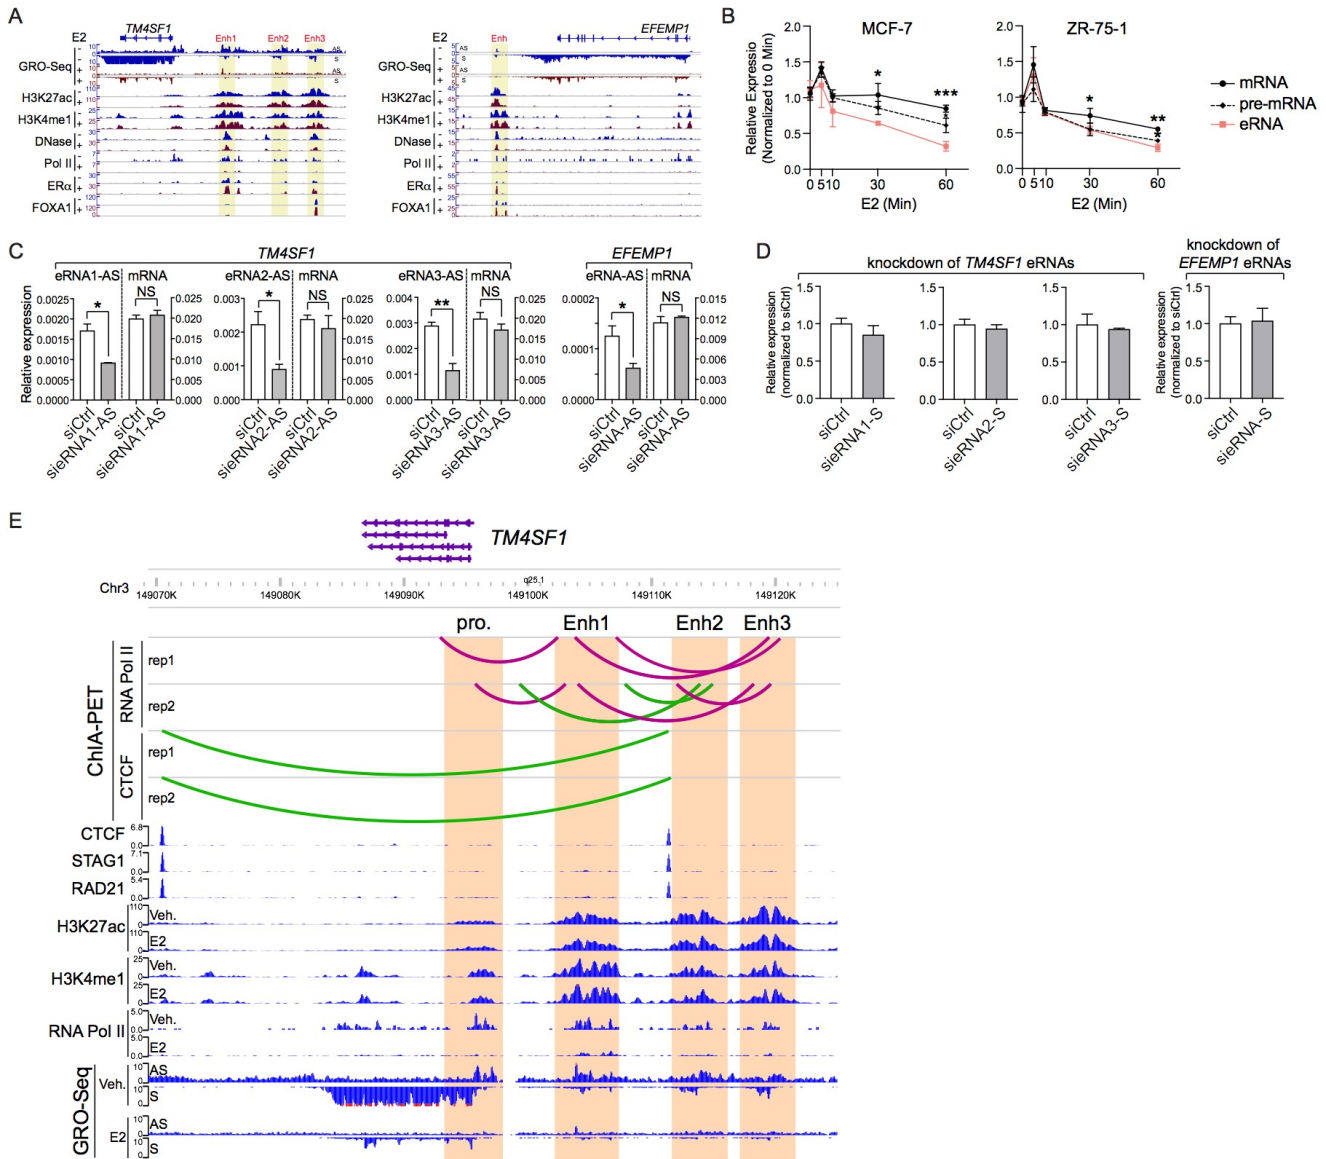

Figure S2. E2-repressed eRNAs control the expression of cognate mRNAs in a specific manner. Related to Figure 2.

(A). The Integrative Genomics Viewer (IGV) of GRO-Seq, ChIP-Seq and DNase-Seq (DNase) at genomic loci of *TM4SF1* and *EFEMP1*. Sense (S)- and antisense (AS)-strand information was indicated. Enhancers of *TM4SF1* (Enh1-3) and *EFEMP1* (Enh) were highlighted. The genome-wide sequencing data sets included in this figure are: GSE45822 (GRO-Seq) (Li et al., 2013), GSE45822 (H3K27ac) (Li et al., 2013), GSE40129 (H3K4me1) (Theodorou et al., 2013), GSE33216 (DNase) (He et al., 2012), GSE45822 (Pol II) (Li et al., 2013), E-TABM-828 (ER $\alpha$ ) (Schmidt et al., 2010) and GSE26831 (FOXA1) (Kong et al., 2011).

(B). Expression of mRNA, pre-mRNA and eRNA of *EFEMP1* in MCF-7 and ZR-75-1 cells at different time points upon 100 nM E2 treatment. The forward primer for detecting *EFEMP1* mRNA is aligned across the junction between exon 1 and 2, and the reverse primer targets sequence in exon 3. Both primers for detecting pre-mRNA *EFEMP1* are located in intron 2.

(C). Expression of antisense (AS)-strand eRNA and mRNA of *TM4SF1* and *EFEMP1* in MCF-7 cells after knocking down the specified antisense (AS)-strand eRNAs. Data were normalized to mRNA levels of *GAPDH*.

(D). Expression of *COMMD2* mRNA upon knockdown of sense (S)-strand eRNAs of *TM4SF1* and *EFEMP1*. Data were normalized to conditions with control siRNA (siCtrl) transfection.

Data in (B)-(D) are presented as mean  $\pm$  SD with three biological and technical replicates. *P*-values in (B) and (C) were calculated by Student's *t*-test. \*, *P* < 0.05; \*\*, *P* < 0.001; \*\*\*, *P* < 0.005; NS, not significant.

(E). The chromatin structure around *TM4SF1* gene is specially organized so that the enhancers have distinct functions.

The Integrative Genomics Viewer (IGV) of ChIA-PET, ChIP-Seq and GRO-Seq at genomic locus of *TM4SF1* gene. Sense (S)- and antisense (AS)-strand information was indicated. Data that were generated under vehicle (Veh.) or estradiol (E2) treatment condition were also specified. Promoter (pro.) and enhancers of *TM4SF1* (Enh1-3) were highlighted. Pol II or CTCF-mediated chromatin interactions that involve *TM4SF1* Enh2 were marked in green, otherwise in red. The genome-wide sequencing data sets included in this figure are: GSE33664 (Pol II ChIA-PET) (Li et al., 2012), GSE39495 (CTCF ChIA-PET) (Consortium, 2012), E-TABM-828 (CTCF, STAG1 and RAD21 ChIP-Seq) (Schmidt et al., 2010), GSE45822 (H3K27ac) (Li et al., 2013), GSE40129 (H3K4me1) (Theodorou et al., 2013), GSE45822 (Pol II) (Li et al., 2013), GSE45822 (GRO-Seq) (Li et al., 2013).

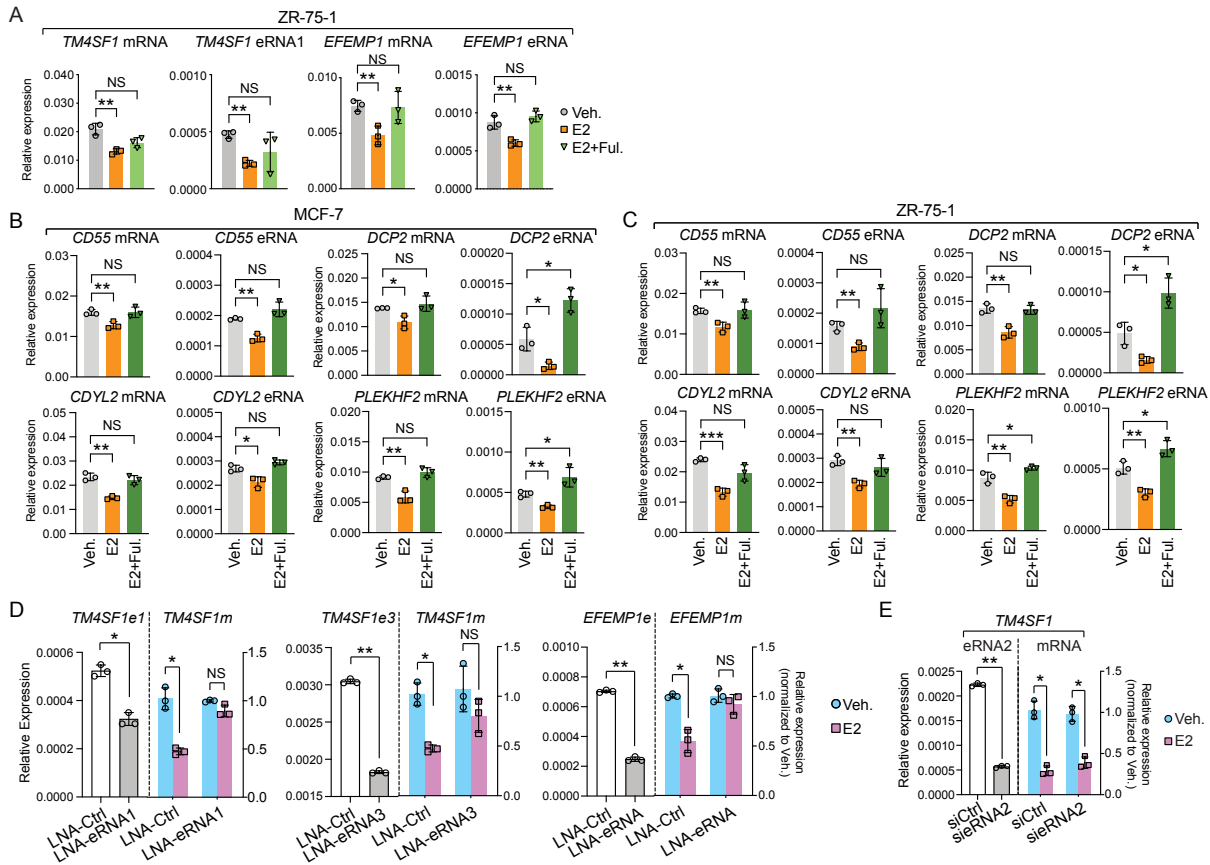

Figure S3. ER $\alpha$  signaling is essential for E2-induced transcriptional silencing of target eRNAs and associated mRNAs. Related to Figure 2.

(A). Expression of mRNA and eRNA of *TM4SF1* and *EFEMP1* in ZR-75-1 cells upon treatment with ethanol (Veh., gray bars), 1 nM estradiol (E2, orange bars) for 3 hrs, or 1 nM estradiol and 1  $\mu$ M fulvestrant for 3 hrs (E2+Ful., green bars). Data were normalized to mRNA levels of *GAPDH*.

(B and C). Expression of eRNA and mRNA of four extra E2-repressed genes upon the treatment as described in (A) in MCF-7 (B) and ZR-75-1 (C) cells. Data were normalized to mRNA levels of *GAPDH*.

\*,  $P < 0.05$ ; \*\*,  $P < 0.001$ ; NS, not significant.

(D and E). E2-repressed eRNAs are required for E2-induced transcriptional silencing. Expression of eRNA (indicated by the white and gray bars) and mRNA (represented by the blue and light pink bars) of *TM4SF1* and *EFEMP1* upon knockdown of specified eRNAs using locked nucleic acid (LNA) probes (D) or siRNA (E) in the absence (Veh.) or presence (E2) of 100 nM estradiol for 3 hrs. Data were normalized to mRNA levels of *GAPDH*. \*,  $P < 0.01$ ; \*\*,  $P < 0.001$ ; NS, not significant.

Data are presented as mean  $\pm$  SD with three biological and technical replicates. Statistical significance was calculated by Student's t-test.

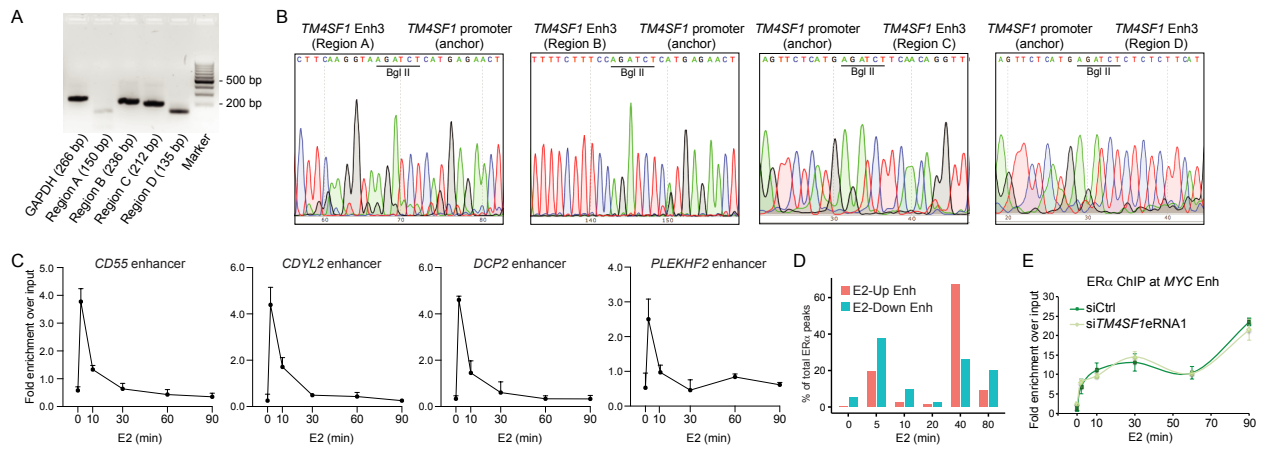

Figure S4. E2-repressed eRNAs play important roles in maintaining functional chromatin environment. Related to Figure 3.

- (A). Agarose gel image showing PCR products of 3C ligation assays.
- (B). Sanger sequencing results of 3C ligation products between *TM4SF1* promoter and different regions around *TM4SF1* Enh3.
- (C). ER $\alpha$  binding at the enhancer regions of indicated genes in MCF-7 cells treated with 100 nM E2 for indicated lengths of time.
- (D). Bar plot showing percentages of E2-upregulated (E2-Up Enh) and E2-downregulated enhancers (E2-Down Enh) that show detectable ER $\alpha$  binding intensities at different time points after E2 treatment in a separate ER $\alpha$  ChIP-Seq data (GSE62789) (Honkela et al., 2015).
- (E). ER $\alpha$ -targeted ChIP at *MYC* enhancer (*MYC* Enh) after knocking down *TM4SF1* eRNA1 at different time points upon 100 nM E2 treatment in MCF-7 cells.
- Data in (C) and (E) are presented as mean  $\pm$  SD with three biological and technical replicates.

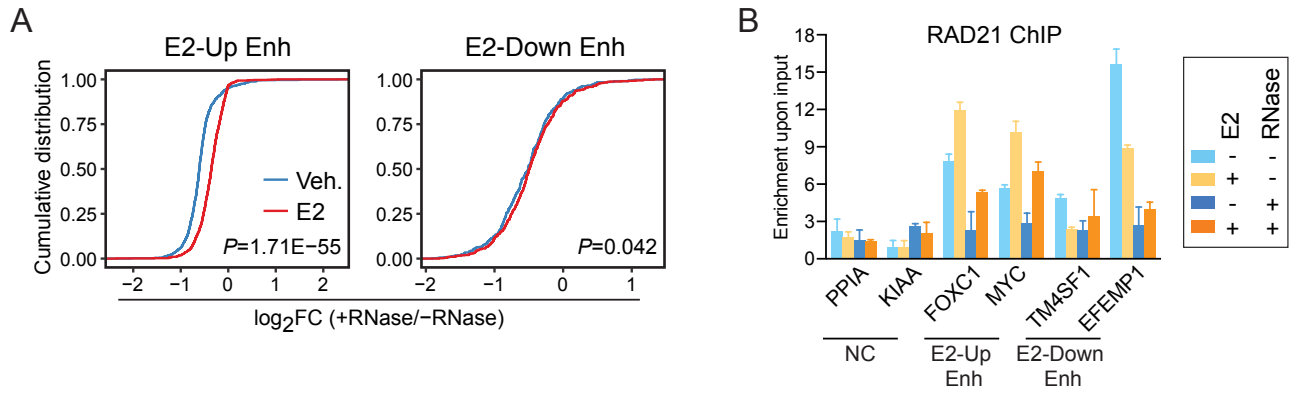

Figure S5. E2-induced ER $\alpha$  binding at E2-downregulated enhancers is particularly dependent on RNA integrity. Related to Figure 4.

(A). Cumulative distribution of ER $\alpha$  binding intensity at E2-upregulated (E2-Up Enh) and E2-downregulated enhancers (E2-Down Enh) before (-) and after (+) RNase treatment in the absence (Veh.) or presence of E2. The fold change of ER $\alpha$  peak intensities was log<sub>2</sub>-transformed (log<sub>2</sub>FC).

(B). RAD21-targeted ChIP at E2-upregulated (E2-Up Enh) or E2-downregulated enhancers (E2-Down Enh) in MCF-7 cells. Cells were treated with (+) or without (-) 100 nM E2 for 30 min in the presence or absence of RNase. NC, negative controls using promoters of *PPIA* and *KIAA0066* as binding sites. Data are presented as mean + SD with three biological and technical replicates.

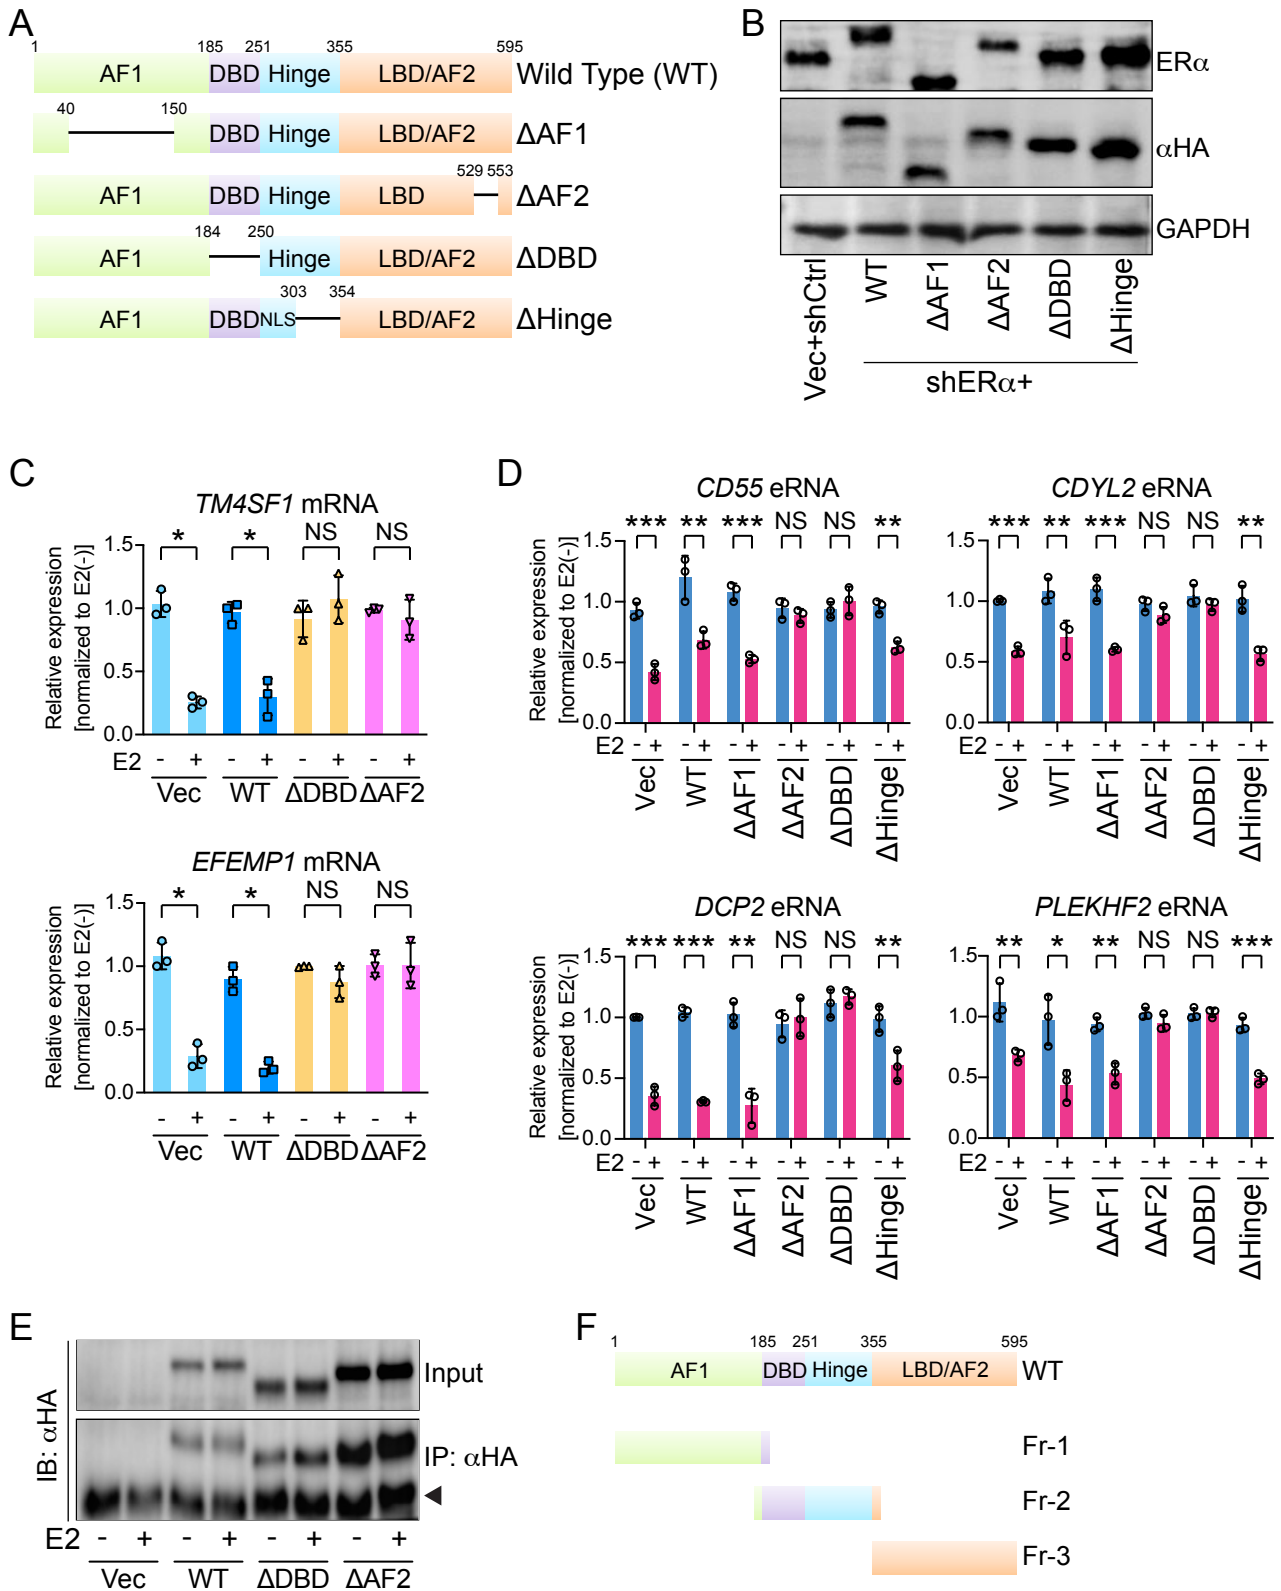

Figure S6. DNA-binding domain (DBD) of ER $\alpha$  plays an essential role in binding with E2-repressed eRNAs. Related to Figure 5.

(A and B). Schematic diagram illustrating the protein structures of wild-type ER $\alpha$  and various truncations (A) and their protein levels after replacing the endogenous ER $\alpha$  in MCF-7 cells (B).  $\Delta$ AF1, deletion of activation function 1;  $\Delta$ AF2, deletion of activation function 2;  $\Delta$ DBD, deletion of DNA-binding domain;  $\Delta$ Hinge, deletion of hinge region; LBD, ligand-binding domain; NLS, nuclear localization signal. The corresponding residues of each domain or deleted parts are numbered.

(C and D). Expression of *TM4SF1* and *EFEMP1* mRNAs (C) or levels of mRNAs of four additional genes (D) in MCF-7 cells expressing empty vector (Vec), wild-type ER $\alpha$  (WT) or its truncated mutants in the absence (-) or presence (+) of 100 nM E2 for 3 hrs. Data were normalized to corresponding vehicle (-E2) condition. p values denoted differences between Veh and E2 (n=3; Student's t-test).

(E). Immunoprecipitation (IP) efficiency of RIP assay using anti-HA beads in MCF-7 cells. The replacement system was the same as illustrated in (A and B), and cells were treated with 100 nM E2 treatment for 5 min. Arrowhead, IgG heavy chain.

(F). Schematic diagram of full-length ER $\alpha$  (WT) and various GST-tagged fragments (Fr-1, -2 and -3). The amino acid numbers of each protein domain were shown.

Data are presented as mean  $\pm$  SD with three biological and technical replicates. P-values were calculated by Student's t-test. \*,  $P < 0.05$ ; \*\*,  $P < 0.01$ ; \*\*\*,  $P < 0.001$ ; NS, not significant.



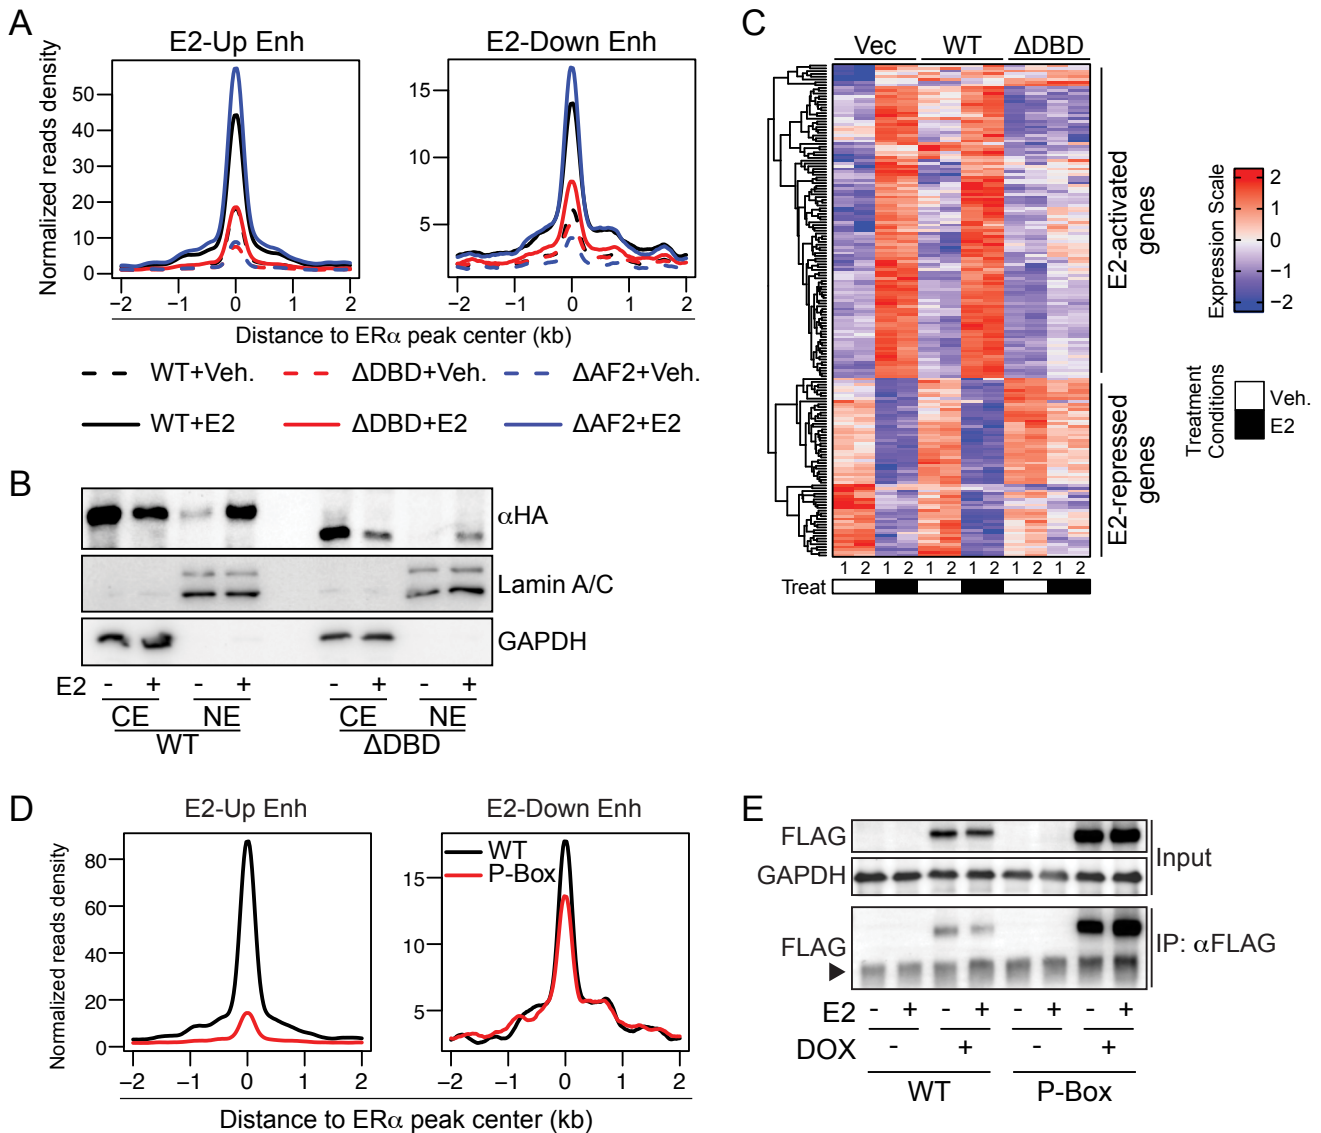

Figure S7. DNA-binding domain (DBD) of ER $\alpha$  is required for indirect chromatin binding of ER $\alpha$  at E2-downregulated enhancers, which is mediated by E2-repressed eRNAs. Related to Figure 5.

(A). Aggregate plots of ER $\alpha$  peak signals at E2-upregulated (E2-Up Enh) or E2-downregulated enhancers (E2-Down Enh) in anti-HA-targeted ChIP-Seq in MCF-7 cells treated with 100 nM E2 for 30 min. WT, wild type;  $\Delta$ DBD, DNA-binding domain deletion;  $\Delta$ AF2, activation function 2 deletion.

(B). Cytoplasmic extracts (CE) and nuclear extracts (NE) of MCF-7 cells expressing wild-type ER $\alpha$  (WT) or DBD-deletion mutant ( $\Delta$ DBD) in the absence (-) or presence (+) of 100 nM E2 for 30 min.

(C). Heat map of E2-dependent expression of E2-activated and E2-repressed coding genes in MCF-7 cells expressing control vector (Vec), wild-type ER $\alpha$  (WT) or DBD-deletion mutant ( $\Delta$ DBD). Cells were treated with 100 nM E2 for 6 hrs.

(D). Aggregate plot of binding signals of wild-type ER $\alpha$  (WT) or P-Box mutant (P-Box) at E2-upregulated (E2-Up Enh) and E2-downregulated enhancers (E2-Down Enh) in MCF-7 cells that were kept in regular culturing medium.

(E). Immunoprecipitation (IP) efficiency of RIP assay using anti-FLAG antibody in MCF-7 cells expressing inducible wild-type ER $\alpha$  (WT) or P-Box mutant (P-Box). Cells were treated with 100 nM E2 for 5 min and proteins were induced by 2  $\mu$ g/ml doxycycline (DOX) overnight. Arrowhead, IgG band.

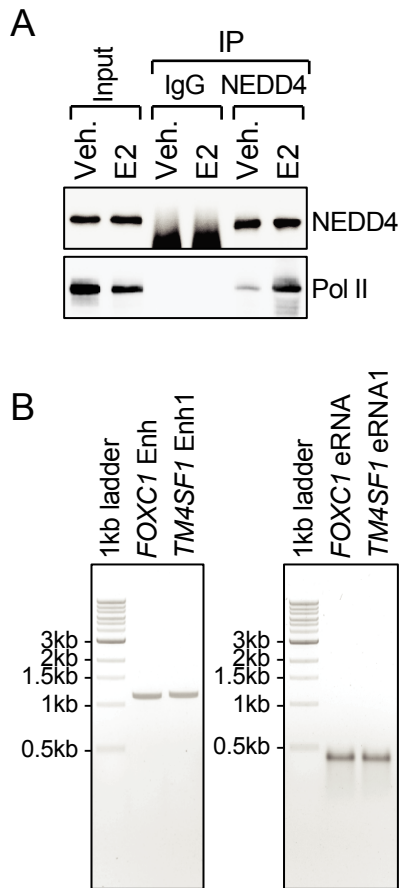

Figure S8. E2-repressed eRNAs assist ER $\alpha$  in its interaction with KDM2A, which leads to association between RNA Pol II and NEDD4. Related to Figure 6.

(A). Immunoprecipitation (IP) of NEDD4 in MCF-7 cells treated with vehicle (Veh.) or 100 nM E2 for 3 hrs.

(B). Agarose gel image showing PCR products that were amplified to contain enhancer regions of *FOXC1* (*FOXC1* Enh) and *TM4SF1* (*TM4SF1* Enh1) (left panel) or *in vitro* transcribed eRNAs of *FOXC1* (*FOXC1* eRNA) and *TM4SF1* (*TM4SF1* eRNA1) (right panel). 1 kb DNA ladder was marked.

## Supplemental Tables

Table S1. siRNA and LNA sequences. Related to Figure 2, Figure S2, and Figure S3.

| <b>Names</b>         | <b>5'-3' Sequences</b> |
|----------------------|------------------------|
| siTM4SF1 eRNA1-AS_F  | CAGAAAGGGAGUUGAGAUUUU  |
| siTM4SF1 eRNA1-AS_R  | AAUCUCAACUCCCUUUCUGUU  |
| siTM4SF1 eRNA1-S_F   | UGAGAGUGCUGAAGUCAUAUU  |
| siTM4SF1 eRNA1-S_R   | UAUGACUUCAGCACUCUCAUU  |
| siTM4SF1 eRNA2-AS_F  | GGAGGGGCAUGGAGGUUAAUU  |
| siTM4SF1 eRNA2-AS_R  | UUAACCUCCAUGCCCCUCCUU  |
| siTM4SF1 eRNA2-S_F   | UCCCAGAGUCCGCCGUAAAUU  |
| siTM4SF1 eRNA2-S_R   | UUUACGGCGGACUCUGGGAUU  |
| siTM4SF1 eRNA3-AS_F  | UGGUAGAAGUCAUGAGAUUUU  |
| siTM4SF1 eRNA3-AS_R  | AAUCUCAUGACUUCUACCAUU  |
| siTM4SF1 eRNA3-S_F   | GGUAGGAACUGCAGACUUUUU  |
| siTM4SF1 eRNA3-S_R   | AAAGUCUGCAGUCCUACCUU   |
| siEFEMP1 eRNA-AS_F   | GGGCUAAAUGCCUCCAAAAUU  |
| siEFEMP1 eRNA-AS_R   | UUUUGGAGGCAUUAAGCCCUU  |
| siEFEMP1 eRNA-S_F    | GGACAGAGUAGAGGAGAUUUU  |
| siEFEMP1 eRNA-S_R    | UAUCUCCUCUACUCUGUCCUU  |
| LNA-TM4SF1-eRNA1     | AATTAAAAAGTGTCGT       |
| LNA-TM4SF1-eRNA3     | CTGACTAGGTAATGCT       |
| LNA-EFEMP1-eRNA      | TTAGTGGTGTGCGAGTG      |
| LNA-negative control | AACACGTCTATACGC        |

Table S2. Primers for RT-qPCR and RIP-qPCR. Related to Figure 2, Figure 3, Figure 4, Figure 5, Figure 6, Figure S2, Figure S3, and Figure S6.

| <b>Gene Names</b> | <b>5'-3' Sequences</b>      |
|-------------------|-----------------------------|
| GAPDH_F           | TGCACCACCAACTGCTTAGC        |
| GAPDH_R           | GGCATGGACTGTGGTCATGAG       |
| TM4SF1_F          | CACAATGTGCTTGGGTTTCAG       |
| TM4SF1_R          | TATGTCTTGATTCCCTCGGC        |
| EFEMP1_F          | GCCGCACAGGTATTTTTGCT        |
| EFEMP1_R          | TGTCCTGTGACTTGACCAGC        |
| COMMD2_F          | TGCTGGTTTAATCTGTTGCCT       |
| COMMD2_R          | CGATTCTGAGTGAATTGGCA        |
| TM4SF1-premRNA_F  | TACACCTTTGCCAGCACTGA        |
| TM4SF1premRNA_R   | AAACACTGGCTAGGTGGGTG        |
| EFEMP1-premRNA_F  | CCTGGACTCCTACCACATGC        |
| EFEMP1-premRNA_R  | AGGCCACTTACTTGAGAATGC       |
| TM4SF1_eRNA1-S_F  | TCTATGACTTCAGCACTCTCAAAGA   |
| TM4SF1_eRNA1-S_R  | CTTGGAGAATGCTCACACTGC       |
| TM4SF1_eRNA1-AS_F | AGTTGTTCACTATGGGAACCC       |
| TM4SF1_eRNA1-AS_R | ACAGTCATTTGGCCAGGCTA        |
| TM4SF1_eRNA2-S_F  | TCTCACTCAACAACAACTGGC       |
| TM4SF1_eRNA2-S_R  | ATTTTTACGGCGGACTCTGG        |
| TM4SF1_eRNA2-AS_F | CTTAACGCCAAGCTCACAGG        |
| TM4SF1_eRNA2-AS_R | CAGACCAGAGATGCACCTCA        |
| TM4SF1_eRNA3-S_F  | GTCAGGTAGGAACTGCAGACT       |
| TM4SF1_eRNA3-S_R  | ACCAAACTATAGCCTCATCCA       |
| TM4SF1_eRNA3-AS_F | AGCAGTAGCCAGTTTCAGCA        |
| TM4SF1_eRNA3-AS_R | CCTGTTCGGTGTA AAAAGGCC      |
| EFEMP1_eRNA-S_F   | AGGAATTTCCAGCAGCTTCA        |
| EFEMP1_eRNA-S_R   | CCACCCAGAATCCTGCAGTA        |
| EFEMP1_eRNA-AS_F  | TGGAGGACTGGGCTTAATGC        |
| EFEMP1_eRNA-AS_R  | GAGGGAGATGTGGTCACCAA        |
| PGLYRP2_eRNA_F    | GCATACCGATCACCGAATTGA       |
| PGLYRP2_eRNA_R    | TCCTGGCAATGATCGTCAAC        |
| ZDHHC22_eRNA_F    | TGCAGCTCCTTGCATCTT          |
| ZDHHC22_eRNA_R    | AAGCAGCTTCTGCCTTGA          |
| SEMA3G_eRNA_F     | CACTCAGGGTGACCTTCTTTC       |
| SEMA3G_eRNA_R     | CTGTGTATTGTACTAAATGGACTGATG |
| KCNC1_eRNA_F      | CAGAGTGAGAGTAGCCTGTAGA      |
| KCNC1_eRNA_R      | GTAGTGTCCCGTTGGCATAG        |
| SYT8_eRNA_F       | GAGGATGATCTATGCAGGATGTG     |
| SYT8_eRNA_R       | CTTGGTGTTCAGGGAGGATTT       |

|               |                           |
|---------------|---------------------------|
| PGR_eRNA_F    | GCAATTCAGGTCAAGATGTCTAAAT |
| PGR_eRNA_R    | TGGTCTCTACAGTCTACAAGGT    |
| FOXN1_eRNA_F  | AGGGAGTGCTCTGGGAA         |
| FOXN1_eRNA_R  | AGAGCAGCACTGACATCAC       |
| KCNK5_eRNA_F  | GTCCTTTGTATCTTTGGGTCTTC   |
| KCNK5_eRNA_R  | CTGCCTTTCTCCCTCTGAATA     |
| ENPP2_eRNA_F  | CTGGACTCTCTGGCTTGTTTAG    |
| ENPP2_eRNA_R  | ATTCCACAGCAACCCTATG       |
| CT62_eRNA_F   | CTGGATCAGACCAACGTGAA      |
| CT62_eRNA_R   | AGGATCTGTTTGCTCTACTAAGAAT |
| SMAD7_eRNA_F  | TGGTTCAGTTCAAGTACCTGTT    |
| SMAD7_eRNA_R  | TTTCCACAGGTGAGCAGAAA      |
| MYCB_eRNA_F   | GTCAGCACAGCACACTAGAT      |
| MYCB_eRNA_R   | CTGCTGTTCGTGTTGTCATTT     |
| TTC9_eRNA_F   | CAGAAAGCCAAGTCAACAGAAG    |
| TTC9_eRNA_R   | GTAGCATCAGCTTATCAGAAGGA   |
| SYDE2_eRNA_F  | TTGGGTTTCGAGTGTTACATTC    |
| SYDE2_eRNA_R  | TCTTCCACAATCCACCTTCTAC    |
| SPRY1_eRNA_F  | GTCAGAAGCCTCAGGGAAATAG    |
| SPRY1_eRNA_R  | GGCAGGGCAAGGGTAATAAA      |
| CCNG2_eRNA_F  | GTCTGGGCAGCTAATCTATTCC    |
| CCNG2_eRNA_R  | TTCTCTCCATTAGGCTCTGA      |
| DSCR8_eRNA_F  | CAAGGACATGATTTGGGAGTAAGA  |
| DSCR8_eRNA_R  | GACAGCCTAAGCTACAGAAACC    |
| BMF_eRNA_F    | CTAGGGACCCATCTCACTCTAT    |
| BMF_eRNA_R    | TCTGGAACCTTAAGCTGGCTAAC   |
| KRT7_eRNA_F   | CAGTCAGAGCCAATGTGTGA      |
| KRT7_eRNA_R   | ACCCTGGCACACCTGAG         |
| GLCCI1_eRNA_F | GAAGGAGGCCTTCAGTCTATTT    |
| GLCCI1_eRNA_R | CCAGGCTTCTTGTAGCCATATTA   |
| PAK2_eRNA_F   | GTAAGGAGCCTCTTTCACAATAC   |
| PAK2_eRNA_R   | CCTCCAAGACCCAATAAA        |
| WEE1_eRNA_F   | AGTAATCTGAACGAAGCCAGTT    |
| WEE1_eRNA_R   | GGGTTAGTGACATACACAGGAAA   |
| ARMC9_eRNA_F  | GCAATGGAGTCCTAGTGACAAATA  |
| ARMC9_eRNA_R  | AGGCTACTTTGCTGCGTAATA     |
| ZNF217_eRNA_F | GGAAGCAGTAACTCATTTCGAAG   |
| ZNF217_eRNA_R | GCAAGAGACAGAGAGAGAGAGA    |
| SALL4_eRNA_F  | CTGTAACAGAGAGCCACAGAC     |
| SALL4_eRNA_R  | ATCTACGAGCCAAGGAGAGA      |

|                  |                        |
|------------------|------------------------|
| PRLR_eRNA_F      | CCCACGTTGCACATTCTCTA   |
| PRLR_eRNA_R      | AGCAAACCTTCTCCATGTCTGT |
| TNFRSF11B_eRNA_F | ACAGACAGACCAAGCCCATT   |
| TNFRSF11B_eRNA_R | TTGGAACCTTGGAAGGAAGCT  |
| ARID5B_eRNA_F    | CCCATGGAGTTGGCTATCCT   |
| ARID5B_eRNA_R    | TGCCTGTTCTACTCTGGTGG   |
| LYPD3_eRNA_F     | AGCCCTGAAAAAGAGGCTGA   |
| LYPD3_eRNA_R     | GAGTGAGAGGGTTTAGCCGT   |
| TMEM116_eRNA_F   | AAGGGTTGCATTGCATTCCC   |
| TMEM116_eRNA_R   | CAACAGTGCGTGATGTGCTT   |
| CDYL2_F          | GCCCGTCGGTTGAGAAACT    |
| CDYL2_R          | GCTTCCGTTTATGGGAGGTCC  |
| CDYL2_eRNA_F     | GTCTAGAGACACAGGGAGGC   |
| CDYL2_eRNA_R     | TTCCTGGTTCTGCTCTCTGG   |
| CD55_F           | AGGCCGTACAAGTTTTCCCG   |
| CD55_R           | CCTTCTCGCCAGGAATTTTCAC |
| CD55_eRNA_F      | GCTCCTCAAGTCTCACACCT   |
| CD55_eRNA_R      | AGAGATGTGACTGCAGGCAA   |
| DCP2_F           | AGAACACACCAGGATTACCTCA |
| DCP2_R           | AGCAAAAACGGACAATGACTGA |
| DCP2_eRNA_F      | TGGAACCAACACCTTCGAAT   |
| DCP2_eRNA_R      | ACAGACTTGGTGCACAGCTA   |
| PLEKHF2_F        | CCGTCGGGGCTATTAGTGAAA  |
| PLEKHF2_R        | TGACCAGCTGCTCCAAAACA   |
| PLEKHF2_eRNA_F   | ACGTGGTAGGCAAACAGGAT   |
| PLEKHF2_eRNA_R   | GACAATCTGTTCTGGCAGCC   |

Table S3. Primers for 3C-qPCR. Related to Figure 3.

| <b>Names</b> | <b>5'-3' Sequences</b>                      |
|--------------|---------------------------------------------|
| Anchor       | CTGAATCATGGCAGCAGTTTCCCCCATGC               |
| Region A     | TGACAGGACACAGAGAGTTAGGTCAGGGCA              |
| Region B     | AGAGAGTTCAGATGACTTGCCCAGAATCCAG             |
| Region C     | CACGCTGAGGCTCCACTGACAAGTGCAAG               |
| Region D     | GCGAGATGTTCTTTAGGTAGGCAGCCAGGGA             |
| GAPDH_3C_F   | ACAGTCCATGCCATCACTGCC (Hagege et al., 2007) |
| GAPDH_3C_R   | GCCTGCTTCACCACCTTCTTG (Hagege et al., 2007) |

Table S4. Primers for ChIP-qPCR. Related to Figure 3, Figure 5, Figure 6, Figure S4, and Figure S5.

| <b>Names</b>  | <b>5'-3' Sequences</b>                         |
|---------------|------------------------------------------------|
| TM4SF1_Enh1_F | CACCTAGACCTCATGGCCTC                           |
| TM4SF1_Enh1_R | TGCCATGTTGGACTTTGACA                           |
| TM4SF1_Enh2_F | TGTGGCTTCTGAAGAGCTGA                           |
| TM4SF1_Enh2_R | CATGCCCTCCTTTGTGAAC                            |
| TM4SF1_Enh3_F | GTCCAAACATACTGCTGCCA                           |
| TM4SF1_Enh3_R | CCAGTGTGTGTTAGTCAGCC                           |
| TM4SF1_pro_F  | AACTGCCAAGTGCCGAGAT                            |
| TM4SF1_pro_R  | AGCTCTCAGATTGGAAGCTGT                          |
| EFEMP1_Enh_F  | TGTTCTAAATGCCAGGGCCT                           |
| EFEMP1_Enh_R  | CACAGCTGCAGGGATAGGAA                           |
| GAPDH_pro_F   | TACTAGCGGTTTTACGGGCG (Xu et al., 2012)         |
| GAPDH_pro_R   | TCGAACAGGAGGAGCAGAGAGCGA (Xu et al., 2012)     |
| KIAA0066_F    | CTAGGAGGGTGGAGGTAGGG (Varambally et al., 2008) |
| KIAA0066_R    | GCCCCAAACAGGAGTAATGA (Varambally et al., 2008) |
| PPIA_F        | GCCAGGCTCCTGTTTTAATG                           |
| PPIA_R        | GCAGTCTCCGTTTTGAGAG                            |
| MYC_Enh_F     | CCAGCTTTCACCAACCACTC                           |
| MYC_Enh_R     | GCAGGTGTCCTAGAGCATGA                           |
| FOXC1_Enh_F   | GCGTCTCAGAATGGACAGGA                           |
| FOXC1_Enh_R   | TAAAGATCGCAGTGGCCCTT                           |
| CD55_Enh_F    | TGAGGCATAGATAGGCACATTAC                        |
| CD55_Enh_R    | CAGGCAACATTCCCTCCAGAA                          |
| CDYL2_Enh_F   | GGAGCTAGAATTGGCCACTATG                         |
| CDYL2_Enh_R   | GGACACCACCTACCATCTACT                          |
| DCP2_Enh_F    | TGCCAAGCAGATGGTTAAGT                           |
| DCP2_Enh_R    | CACAGGGAAAGCCTGAAAGA                           |
| PLEKHF2_Enh_F | CCTACCACGTTGCAGACAAA                           |
| PLEKHF2_Enh_R | ATGGGTCATCAAAGCACTGG                           |
